# Supplementary material for: Portable platform for measuring amyloid beta 42/40 ratio via photooxidation-induced fluorescence amplification
Source: Royal Society of Chemistry journal article supplement (doi:10.1039/d5lc00235d), 2025-01-01
Supplement: d5lc00235d2.xlsx [file d5lc00235d2.xlsx]

## Sheet: Supplemantary
		Disease status (0: SCD, 1: AD, 2:aMCI)	Sample	Concentration(pg/ml)			Concentration(pg/ml)			1: Male 2: Female			0: Apoe4 - 1: Apoe4 +				0: Amyloid PET - 1: Amyloid PET +
				PIFA ab 42	PIFA ab 40	PIFA 42/40	SiMoA Ab42	SiMoA AB40	SiMoA AB 42/40	Sex	Age	Years of Education	APOE	MMSE	CDR	CDR-sb	Amlyoid PET status	MRI
		2	1	19.0059	227.898	0.0833965	17.1	295	0.0579661	2	68	6	1	28	0.5	1.5		Mild brain atrophy and leukoaraiosis with normal DWI Right PCom. aneurysm
		1	2	13.9665	199.677	0.0699456	29.1	271	0.10738	1	78	6	1	15	1	3.5		1. No evidence of acute infarction in brain. 2. Focal old infarction, Lt anterior BG-CR and Lt cerebellum 3. Mild SVD(small vessel disease) 4. Mild diffuse brain atrophy.
		1	3	41.1506	439.422	0.093647	50	481	0.10395	2	64	12	0	28	0.5	2.5		1. small vessel disease with Fazekas grade 1 WMH and multiple chronic lacunar infarctions/ enlarged PVSs of both deep gray matter. 2. mild global brain atrophy without regional profound atrophy, GCA: 1-2, MTA : 1-2. 3. a microbleed at the left medial temporal lobe. 4. a few chronic lacunar infarctions and microbleeds in pons.
		2	4	19.0361	226.427	0.0840714	26.3	257	0.102335	2	66	2	1	24	0.5	1.5
		2	5	18.183	202.54	0.0897751	28.8	292	0.0986301	2	76	6	0	23	0.5	2.5
		2	6	21.4255	220.288	0.0972614	22.9	226	0.101327	2	78	0	1	17	0.5	2.5		1. No evidence of acute infarction in brain. 2. Moderate diffuse brain atrophy (GCA-2, MTA Rt-1; Lt-1) 3. Mild SVD(small vessel disease) 4. Lt maxillary sinusitis
		1	7	18.4399	252.692	0.0729737	33.4	368	0.0907609	2	87	6	0	12	2	12		1. A tiny acute infarction, Lt occipital SCWM. 2. SVD(small vessel disease), with moderate WMH and microbleeds 3. Moderate diffuse brain atrophy (GCA-2, MTA Rt-3; Lt-3)
		1	8	19.3072	167.88	0.115006	19.9	243	0.081893	2	77	0	1	19	0.5	4		1. Old lacunar infarction in the both basal ganglia. 2. Mild brain atrophy and leukoaraiosis with normal DWI 3. Normal MRA
		2	9	20.7966	242.457	0.0857744	25.1	317	0.0791798	1	74	12	0	19	1	4.5		1. Old lacunar infarction in the both basal ganglia. 2. Brain atrophy and leukoaraiosis(GCA II, Fazekas I, MTA III) with normal DWI
		2	10	20.8001	227.004	0.0916285	21.5	238	0.0903361	2	61	12	0	27	0.5	2		normal
		2	11	17.5177	255.173	0.0686503	19.7	258	0.0763566	1	70	21	1	26	0.5	2		1. small vessel disease with Fazekas grade 1-2 WMH. 2. focal small area of encephalomalacia in the right striatocapsular region. 3. global brain atrophy without regional profound atrophy, GCA : 2, MTA :2. 4. no evidence of intracranial tumorous lesion.
		2	12	20.151	251.377	0.0801626	30.5	281	0.108541	2	86	0	0	20	0.5	1.5		1. Acute lacunar infarction in he riht corona radiata. 2. Mild brain atrophy and leukoaraiosisfor age. 3. Stenosis of the superior division of the right M2 and left P1.
		2	13	12.0658	200.196	0.0602699	19.5	236	0.0826271	2	63	9	1	21	0.5	2		normal
		1	14	14.7928	192.299	0.0769259	15.9	186	0.0854839	2	66	1	0	29	0.5	1.5
		1	15	9.16008	128.875	0.0710775	16.5	80.9	0.203956	2	80	6	1	20	1	4.5		1. Old lacunar infarction in the both basal ganglia. 2. Brain atrophy and leukoaraiosis(GCA II, Fazekas I, MTA I) with normal DWI 3. Mild stenosis of the left V4.
		2	16	14.2452	180.325	0.0789973	11.9	173	0.0687861	2	58	16	0	21	1	5		normal
		1	17	11.4183	99.0539	0.115274	19	249	0.0763052	2	80	12	0	11	2	12		1. Old lacunar infarction in the right basal ganglia. 2. Brain atrophy and leukoaraiosis(GCA III, Fazekas I, MTA III) with normal DWI
		1	18	16.2462	159.579	0.101807	16.1	190	0.0847368	1	77	16	0	16	1	7		Brain atrophy and leukoaraiosis(GCA II, Fazekas II, MTA II) with normal DWI
		2	19	20.39	203.35	0.10027	27.7	271	0.102214	2	66	12	1	28	0.5	2.5		normal
		1	20	18.7822	263.053	0.0714007	27.2	311	0.0874598	2	85	6	0	15	1	4.5		1. Old lacunar infarction in the both basal ganglia. 2. Brain atrophy and leukoaraiosis(GCA II, Fazekas I, MTA II) with normal DWI
		2	21	13.3901	181.371	0.0738272	13.2	174	0.0758621	1	63	16	1	22	0.5	3		normal
		2	22	17.6886	209.266	0.0845267	29.5	313	0.0942492	2	81	0	0	20	0.5	1		1. No evidence of abnormal diffusion restrictive lesion in brain. 2. Mild SVD(small vessel disease)
		1	23	17.03	167.587	0.101619	22.1	309	0.071521	1	84	16	0	24	0.5	2	1	1. Old lacunar infarction in the both basal ganglia. 2. Brain atrophy and leukoaraiosis(GCA II, Fazekas I, MTA II) with normal DWI
		1	24	16.3582	174.927	0.0935142	17.5	192	0.0911458	1	77	9	0	25	1	5.5	0	1. mild small vessel disease with Fazekas grade 1 WMH. 2. mild global brain atrophy without regional profound atrophy, GCA: 1-2. MTA : 1. 3. iron deposition in posterolateral part of both putamina. ddx> MSA-P.
		1	25	20.2059	227.943	0.0886447	23.4	314	0.0745223	2	79	6	0	18	1	4.5		1. Old lacunar infarction in the both basal ganglia and left pons. 2. Brain atrophy and leukoaraiosis(GCA II, Fazekas I, MTA II) with normal DWI 3. cSVD(score III) 4. Mild stenosis of the right V4, due to in-plane saturation artifact.
		2	26	14.1598	184.787	0.0766275	13.1	174	0.0752874	2	66	6	0	21	0.5	3.5		normal
		0	27	15.025	168.303	0.0892737	15.6	174	0.0896552	2	70	9	0	28	0.5	1.5		normal
		0	28	10.3224	212.002	0.04869	14.2	188	0.0755319	2	68	6	0	29	0.5	1.5		1. No evidence of acute infarction in brain. 2. A microbleed, Rt occipital lobe. 3. Otherwise, No remarkable finding in brain.
		0	29	16.4335	171.51	0.095817	21.7	216	0.100463	2	75	7	0	29	0.5	1		normal
		2	30	13.3586	185.233	0.0721179	21.5	192	0.111979	2	74	6	1	20	1	5	1	Regional atrophy of both parietal lobes. lobe. ( GCA score : 1-2, MTA score : 1).
		2	31	17.0222	195.737	0.0869646	18.8	263	0.0714829	2	78	6	0	24	0.5	2		1. Old lacunar infarction in the both basal ganglia. 2. Brain atrophy and leukoaraiosis with normal DWI 3. Stenosis in the both C3.
		2	32	16.7999	208.357	0.0806304	17.6	197	0.0893401	2	81	0	0	23	0.5	3		1. global brain atrophy without regional profound atrophy. GCA: 2, MTA : 1. 2. mild small vessel disease with Fazekas grade 1 WMH.
		1	33	12.89	173.277	0.0743899	16.9	223	0.0757848	1	80	8	0	25	0.5	2		normal
		1	34	19.1589	256.905	0.0745759	25.1	293	0.0856655	2	72	6	0	10	2	10		1. No evidence of acute infarction in brain. 2. Moderate SVD(small vessel disease) 3. Moderate diffuse brain atrophy.
		1	35	15.5926	216.327	0.0720787	19.8	251	0.0788845	2	75	4	1	14	2	10		Brain atrophy and leukoaraiosis(GCA II, Fazekas I, MTA II) with normal DWI
		1	36	17.1698	182.691	0.0939829	16.9	185	0.0913514	2	81	0	0	21	0.5	1		1. Old lacunar infarction in the both basal ganglia. 2. Mild brain atrophy and leukoaraiosis for ageI 3. Cavernous malformation in the right superior temporal subcortical white matter
		1	37	16.3952	157.849	0.103866	19.4	97.3	0.199383	2	57	12	1	25	0.5	2.5	1	normal
		1	38	17.069	263.469	0.0647856	25.8	373	0.0691689	2	63	4	0	15	1	5		normal
		2	39	21.9223	256.357	0.0855147	30.6	375	0.0816	2	72	16	0	26	0.5	1.5		1. Old lacunar infarction in the both basal ganglia. 2. Mild brain atrophy with normal DWI 3. Occlusion of the right proximal M1 with void of disttal MCA flow.
		2	40	13.2218	170.127	0.0777174	19.7	184	0.107065	1	71	16	0	26	0.5	2		normal
		1	41	14.087	171.335	0.0822192	16.9	199	0.0849246	2	69	12	1	26	0.5	2		normal
		0	42	16.7882	180.941	0.0927827	16.3	182	0.0895604	1	71	7	0	28	0.5	0.5	1	normal
		1	43	19.6507	218.515	0.0899281	27.4	361	0.0759003	1	83	16	1	20	1	6		1. Old lacunar infarction in the both basal ganglia. 2. Brain atrophy and leukoaraiosis(GCA II, Fazekas I, MTA II) with normal DWI 3. COM, left
		1	44	21.7624	277.307	0.0784777	19.5	275	0.0709091	2	68	16	1	20	1	7		Mild brain atrophy and leukoaraiosis with normal diffusion
		2	45	17.5134	190.359	0.0920018	22.2	204	0.108824	2	81	12	0	25	0.5	2		1. Old lacunar infarction in the both basal ganglia. 2. Brain atrophy and leukoaraiosis(GCA II, Fazekas I, MTA I) with normal DWI
		1	46	13.9041	212.036	0.0655744	14.4	228	0.0631579	2	79	16	1	22	1	6		Mild brain atrophy and leukoaraiosis. with normal DWI
		1	47	17.4413	167.135	0.104355	17.3	178	0.097191	2	68	12	1	22	0.5	2
		1	48	24.3776	302.824	0.080501	29.2	399	0.073183	1	81	10	0	15	1	7
		1	49	16.4145	227.725	0.0720804	12.5	188	0.0664894	1	75	8	0	23	1	3.5		1. mild global brain atrophy without regional profount atrophy, GCA : 1-2, MTA : 1-2. 2. probable, a small cavernous malformation at the right anteromedial temporal lobe. 3. a microbleed at the right postcentral gyrus. 4. a few chronic lacunar infarctions in both BG. 5. left maxillary sinusitis.
		2	50	13.2272	211.472	0.062548	15.8	239	0.0661088	2	78	4	1	22	0.5	2		1. No evidence of acute infarction in brain. 2. SVD(small vessel disease), with mild WMH 3. Mild diffuse brain atrophy, with mild ventricular dilatation
		1	51	16.7977	166.417	0.100937	14.3	167	0.0856287	2	86	6	1	16	1	5		1. No evidence of acute infarction in brain. 2. SVD(small vessel disease), moderate WMH 3. Mild diffuse brain atrophy, with mild ventricular dilatation 4. Rt sphenoidal sinusitis
		2	52	14.329	207.631	0.0690119	20.3	194	0.104639	1	62	1	0	15	0.5	3		1. No evidence of acute infarct with restricted diffusion in the brain. 2. No evidence of cortical atrophy in both cerebral hemispheres, and no hippocampal atrophy.
		1	53	27.4837	282.831	0.0971737	29.3	223	0.13139	2	82	0	1	20	1	4.5		1. No evidence of acute infarction in brain. 2. SVD(small vessel disease) with mild WMH 3. Mild diffuse brain atrophy.
		0	54	17.2849	148.674	0.116261	19.2	130	0.147692	2	63	9	1	26	0.5	-		1. No evidence of acute infarction in brain. 2. Several T2 hyperintense foci in both cerebral WM; Within normal limit. 3. Otherwise, No remarkable finding in brain.
		0	55	32.7476	154.513	0.211942	22	141	0.156028	1	74	6	0	26	0.5	2.5		1. mild small vessel disease with Fazekas grade 1WMH and multiple enlarged PVSs of deep gray matter. 2. a small pineal gland cyst ( about 5mm). 3. mild global brain atrophy without regional profound atrophy, GCA score : 1, MTA score : 1-2. 4. sinusitis, both ethmod, right maxillary( r/o fungal).
		1	56	14.7833	192.539	0.0767809	29.1	222	0.131081	2	90	9	0	17	1	4.5		1. mild global brain atrophy without regional profound atrophy, GCA: 1, MTA : 2. 2. small vessel disease with Fazekas grade 2-3 WMH. 3. a small pineal gland cyst ( about 5mm). 4. mild abnormal position of neurohypophysis at the posterosuperior portion of pituitary gland.. 5. mild ventricular dilatation, Evan index : 0.31. 6. mild left maxillary sinusitis.
		0	57	16.5521	106.251	0.155783	17.6	190	0.0926316	2	73	12	0	30	0.5	1		1. No evidence of acute infarction in brain. 2. SVD(small vessel disease) with old lacune and mild WMH 3. Mild diffuse brain atrophy, with mild ventricular dilatation
		2	58	20.6832	134.902	0.15332	26.3	194	0.135567	2	75	9	0	26	0.5	2.5		1. global brain atrophy, GCA : 1-2, MTA :1-2. 2. small vessel disease with Fazekas grade 1-2 WMH.
		0	59	16.1672	119.182	0.135651	14.1	190	0.0742105	2	71	13	1	28	0.5	0.5		1. No evidence of acute infarction in brain. 2. SVD(small vessel disease), with mild WMH 3. Otherwise, No remarkable finding in brain
		1	60	10.7626	168.346	0.0639315	16.3	141	0.115603	2	75	6	1	10	1	8
		1	61	13.0376	106.452	0.122474	14.5	113	0.128319	1	67	5	1	0	2	14		A: Cerebrum 1. global brain atrophy without regional profound atrophy, GCA score: 2, MTA score: 2. 2. a small pineal gland cyst (about 7mm). B: Cerebellum -No evidence of significant infarction, hemorrhage, mass, atrophy. C: Brainstem -No evidence of significant infarction, hemorrhage, mass, atrophy. D: Ventricular system -No evidence of hydrocephalus. E: Extraaxial space -No evidence of signific…
		0	62	23.7589	225.786	0.105228	18.6	199	0.0934673	2	70	9	0	29	0.5	1		1. No evidence of acute infarction in brain. 2. About 2.5 mm, T1 low/T2 high SI oval lesion, Lt anterior aspect of pituitary gland --> R/O pituitary adenoma or Rathke's cleft cyst 3. SVD(small vessel disease), with old lacune and mild WMH 4. Mild diffuse brain atrophy
		1	63	23.7618	186.351	0.127511	19	216	0.087963	1	73	6	1	16	1	5.5		1. No evidence of acute infarction in brain. 2. SVD(small vessel disease), with old lacunes and mild WMH 3. Mild diffuse brain atrophy. 4. Lt maxillary sinusitis
		0	64	18.7904	142.104	0.13223	19.2	137	0.140146	2	67	9	0	29	0	0		1. no evidence of signfiicant global or regional brain atrophy. 2. mild small vessel disease with Fazekas grade 1 WMH and a few chronic lacunar infarctions of both BG. 3. a small pineal gland cyst ( about 3mm).
		0	65	19.0672	187.919	0.101465	22.9	165	0.138788	2	63		0	-	-	-		Brain> 1. No evidence of acute infarction in brain. 2. Increased number of innumerable GRE dark SI foci, both cerebral and cerebellar hemispheres. --> Ddx. cavernous malformations combined old microbleeds a/w SVD(small vessel disease) MRA> 1. A tiny (less than 1 mm in height) vascular protrusion, Lt Acha. --> R/O infundibulum vs aneurysm 2. No remarkable steno-occlusive lesion.
		1	66	21.0345	256.21	0.082099	31.4	223	0.140807	2	90	0	0	10	2	12		A: Cerebrum 1. Fazekas grade 1 WMH. 2. global brain atrophy with relative profound regional atrophy of both parietal lobes. GCA score : 2, MTA score : 2-3. 3. a small focal lesion ( about 6mm) with central popcorn like high signal and peripheral dark signal intensity on T2WI and dark blooming on GRE in the right inferior frotnal gyrus, probable cavernous malformation. B: Cerebellum no evidence of…
		1	67	22.3862	186.801	0.11984	33.9	227	0.149339	2	89	6	0	7	3	15		A: Cerebrum and extraaxial space. 1. Fazekas grade 2-3 WMH. 2. global brain atrophy with regional profound atrophy of the left frontal lobe seen as asymmetric widening of overlying SAS. GCA score : 2, MTA score : 2. 3. multiple lacunar infarctions and enlarged PVSs in both BG. 4. a pineal gland cyst ( 7mm). B: Cerebellum no evidence of significant infarction, hemorrhage, mass, atrophy. C: Brainst…
		0	68	16.1727	195.029	0.0829248	14.6	146	0.1	1	53	16	0	29	0.5	1		mild small vessel disease with Fazekas grade 1 WMH. no significant global nor regional brain atrophy. GCA : 1, MTA: 1
		0	69	17.887	192.707	0.09282	20.9	295	0.0708475	1	84	13	1	28	0.5	0.5	1	1. mild small vessel disease with Fazekas grade 1 WMH. 2. global brain atrophy with mild passive ventricular dilatation, GCA: 2, MTA :2. 3. mild sinusitis, right maxillary, both ethmoid.
		0	70	18.1617	179.347	0.101265	18	233	0.0772532	2	83	12	1	29	0.5	1.5	1	1. global brain atrophy without regional profound atrophy, GCA : 2, MTA : 1-2. 2. mild small vessel disease with Fazekas grade 1 WMH. 3. a few microbleeds in the WM of both cerebral hemispheres.
		1	71	19.0475	214.703	0.0887156	25.8	311	0.0829582	1	72	19	0	15	2	10	1	1. global brain atrophy, GCA : 2, MTA : 2( right), 3( left). 2. advanced small vessel disease with Fazekas grade 3 WMH, a chronic lacunar infarction of the left medial thalamus and multiple microbleeds at the left BG, thalamus. --r/o subcortical vascular dementia. 3. an old hemorrhagic cavity at the right BG to EC. 4. a few scattered microbleeds at the left cerebral hemisphere. 5. a chronic lacun…
		0	72	16.3404	168.417	0.0970235	16	173	0.0924855	2	69		0
		1	73	16.1808	135.933	0.119035	25.5	200	0.1275	2	67	4	0	0	3	18	0	A: Cerebrum 1. mild global brain atrophy, GCA : 1, MTA : 3( right), 1-2( left). 2. mild small vessel disease with Fazekas grade 2-3 WMH. B: Cerebellum - No evidence of significant infarction, hemorrhage, mass, atrophy. C: Brainstem - No evidence of significant infarction, hemorrhage, mass, atrophy. D: Ventricular system - No evidence of hydrocephalus. E: Extraaxial space - No evidence of signific…
		0	74	14.8616	178.843	0.0830984	20.9	148	0.141216	2	48
		0	75	18.8607	222.842	0.0846372	20	258	0.0775194	1	76	16	0	21	0.5	1.5		1. global brain atrophy, GCA : 1-2, MTA : 2-3. 2. small vessel disease with Fazekas grade 2-3 WMH and a chronic lacunar infarction of the right BG. 3. a microbleed at the left precuneus.
		0	76	23.7645	238.452	0.0996617	30.5	297	0.102694	1	75	10	0	27	0.5	1.5	0	1. mild small vessel disease with Fazekas grade 1 WMH. 2. multifocal encephalomalacias in the left frontal, right parietal lobes and left cerebellar hemisphere. 3. global brain atrophy with mild ventricular dilatation, GCA : 2, MTA : 2( right), 3 ( left). 4. a microbleed at the right frontal cortex. 5. soft tissue thickening of nasopharyngeal wall --rec: ENT evaluation.
		0	77	19.7093	219.89	0.0896325	27.4	284	0.0964789	1	71	12	0	28	0.5	0.5	0	mild small vessel disease with Fazekas grade 1 WMH.
		0	78	19.164	198.819	0.096389	18.3	169	0.108284	2	71	14	0	24	0.5	2.5	0	1. mild global brain atrophy without regional profound atrophy, GCA : 1, MTA : 0, 2. moderate small vessel disease with Fazekas grade 2 WMH, and multiple chronic lacunar infarctions of deep gray matter.
		0	79	9.29625	150.991	0.0615682	19.2	192	0.1	1	57		0				0	1. mild small vessel disease with Fazekas grade 1 WMH. 2. no significant global or reginal brain atrophy.(GCA: 1, MTA: 1-2). 3. mild ventricular dilatation, Evans index : 0.34.
		0	80	17.1401	226.405	0.0757055	29.6	204	0.145098	1	57		0
		2	81	16.274	203.459	0.0799868	20.4	260	0.0784615	2	77	6	1	27	0.5	0.5	0	1. small vessel disease with Fazekas grade 2 WMH. 2. asymmetric right temporal horn dilatation, probable 2ndary change to asymmetric mild atrophy of the right hippocampus. GCA score : 1, MTA score : 3( right), 1( left).
		0	82	17.6136	149.565	0.117765	18.3	158	0.115823	2	63	18	0	24	0.5	1.5		normal
		1	83	16.7314	198.206	0.084414	15.6	182	0.0857143	1	81	12	1	23	0.5	2.5		global brain atrophy with profound mesial temporal lobe, GCA: 2, MTA 3-4, r/o AD. -- ex vacuo ventricular dilatation. mild maxillary sinusitis, both.
		0	84	20.4458	209.761	0.0974716	21.9	135	0.162222	1	75	12	0	29	0.5	0.5	0	1. mild global brain atrophy without regional profound atrophy, GCA : 1, MTA : 0-1, 2. mild small vessel disease with Fazekas grade 1 WMH.
		0	85	18.9721	209.864	0.0904018	24.3	204	0.119118	2	71	9	0	23	0.5	1		1. mild small vessel disease with Fazekas grade 1 WMH.. 2. mild global brain atrophy without regional profound atrophy. 3. empty sella. 4. maxillary sinusitis, both.
		0	86	16.7053	179.678	0.0929736	17.2	178	0.0966292	2	71	6	0	27	0.5	1	0	1. mild small vessel disease with Fazekas grade 1 WMH. 2. mild global brain atrophy without regional profound atrophy, GCA score : 1, MTA score : 1.
		0	87	14.6378	129.182	0.113312	18.9	181	0.10442	1	68		0				0	1. global brain atrophy without regional profound atrophy, GCA : 1-2, MTA : 1. 2. mild small vessel disease with Fazekas grade 1 WMH. 3. a small pineal gland cyst ( about 3mm). 4. retention cyst in the right maxillary sinus. 5. mastoiditis, right.
		1	88	16.5909	187.243	0.0886058	19.7	212	0.0929245	2	91	14	0	16	2	10	1	1. global brain atrophy without regional profound atrophy. GCA : 1-2, MTA :1-2. 2. advanced small vessel disease with Fazekas grade 3 WMH. 3. bilateral mastoiditis with suspicious otitis media. 4. focal wall defect with intraorbital fat herniation at the medial wall of the right orbit, suggestive of dehiscence of lamina papyracea or old blow-out fracture.
		1	89	13.1969	129.284	0.102077	25.9	265	0.0977358	2	59	16	0	8	2	13		normal
		0	90	13.3367	80.3826	0.165915	18.7	180	0.103889
		1	91	18.9246	228.036	0.0829892	17.9	194	0.092268	2	58	18	1	26	0.5	1.5	1	a chronic lacunar infarction at the left medial temporal lobe. both maxillary sinusitis.
		0	92	17.8054	229.421	0.0776102	25.1	273	0.0919414	2	81	0	1	21	1	7	1	1. focal cystic encephalomalacia at the right putamen to the right CR. -- a/w chronic Wallerian degeneration along corticospinal tract of ipsilateral PLIC to brainstem. 2. mild small vessel disease with Fazekas grade 1 WMH. 3. global brain atrophy, GCA: 2, MTA : 1-2.
		1	93	19.9665	212.249	0.0940713	18.1	255	0.0709804	2	76	12	0	15	1	9	0	Brain atrophy and leukoaraiosis(GCA II, Fazekas I, MTA I) with normal DWI
		1	94	19.5468	198.218	0.0986129	18.8	263	0.0714829	1	86	16	0	26	0.5	0.5	1	1. Brain atrophy and leukoaraiosis(GCA II, Fazekas II, MTA II) with normal DWI 2. Right paraclinoid aneurysm
		1	95	14.7523	183.718	0.0802984	16.4	198	0.0828283	1	76	1	0	15	1	8	1	1. Old lacunar infarction in left thalamus and left pons.. 2. Brain atrophy and leukoaraiosis(GCA III, Fazekas I, MTA III) with normal DWI 3. R/O Alzheimer disease: NPH should be ruled out. 4. Stenosis of both P2, V4, superior division of the left M2 and basilar artery
		0	96	12.1417	167.116	0.0726542	12.8	129	0.0992248	2	74	6	0	23	0.5	2	0	Mild leukoaraiosis, otherwise no remarkable finding in brain.
		1	97	13.6071	211.826	0.0642368	16.6	190	0.0873684	1	75	6	0	0	3	18	1	1. Brain atrophy and leukoaraiosis(GCA III, Fazekas I, MTA III) with normal DWI 2. R/O Alzheimer disease, due to temporoparietal atrophy
		0	98	17.088	177.27	0.0963953	20.5	214	0.0957944	2	73	7	0	28	0.5	1	0	1. no evidence of significant global or regional brain atrophy. 2. small vessel disease with Fazekas grade 1-2 WMH and enlarged PVSs of both deep gray matter. 3. bandlike high signal intensity along the right EC, probable chronic ischemic change.
		1	99	21.6681	202.467	0.107021	30	282	0.106383	2	92	0	0	4	2	12	0	1. No evidence of acute infarction in brain. 2. Multifocal old infarctions, Rt parietal, Lt P-T lobe - insula, and both occipital lobe. - a/w 2ndary dilatation of Lt lateral ventricle 3. SVD(small vessel disease), with old lacune and mild WMH 4. Moderate diffuse brain atrophy.
		0	100	15.4039	227.957	0.0675738	21.3	216	0.0986111	2	72	5	0	25	0.5	0.5	0	1. global brain atrophy with regional profound atrophy of both parietal lobes, GCA : 1-2, MTA : 2, PCA : 2. 2. mild small vessel disease with multiple chronic lacunar infarctions of deep gray matter. 3. a probable, small cavernous malformation in the right parietal SCWM.
		0	101	15.8348	189.838	0.0834118	22.6	240	0.0941667	2	76	1	0	15	1	4	0	1. About 21 x 12 X 17 mm, calcified extra-axial lesion, Lt sphenoidal ridge. --> R/O meningioma 2. No evidence of acute infarction in brain. 3. Focal old ICH cavity, Rt external capsule, BG and CR. 4. SVD(small vessel disease) - mild degree of T2 hyperintensities in both cerebral WM. - microbleeds, Lt BG, Rt F-T lobe and pons. 5. Mild diffuse brain atrophy.
		0	102	13.0758	112.54	0.116188	16.6	125	0.1328	2	65	9	0	28	0.5	1	0	mild small vessel disease with Fazekas grade 1 WMH.
		0	103	18.7884	148.534	0.126493	27.2	104	0.261538	2	69	7	0	27	0.5	0.5	0	Minimal leukoaraiosis, otherwise no remarkable finding in brain.
		1	104	19.9585	204.503	0.0975953	18.5	233	0.0793991	2	80	6	0	0	3	17	1	1.Brain atrophy and leukoaraiosis(GCA III, Fazekas III, MTA IV) with normal DWI 2. R/O Alzheimer disease 3. Stenosis in the superior and inferior divisons of the right M2, and right V4 4. Tiny left paraclinoid aneurysm
		1	105	19.1343	224.199	0.0853451	18.9	204	0.0926471	2	71	16	0	21	0.5	3	0	No remarkable finding in brain. Mild right maxillary sinusitis.
		0	106	15.4607	225.386	0.0685966	22.2	290	0.0765517	1	76	12	0	25	0.5	1	0	1. global brain atrophy without evidence of regional profound atrophy, (GCA 2, MTA :0-1). 2. mild small vessel disease with Fazekas grade 1 WMH.
		0	107	18.3134	203.577	0.0899581	24	303	0.0792079	1	78	12	0	30	0	0	0	1. mild small vessel disease with Fazekas grade 1 WMH. 2. global brain atrophy without regional profound atrophy, GCA : 2, MTA : 1.
		0	108	17.4516	223.006	0.0782562	16.8	177	0.0949153	2	75	6	0	27	0.5	1.5	0	1. small vessel disease with Fazekas grade 2-3 WMH and a few microbleeds of the right caudate nu. 2. global brain atrophy without regional profound atrophy, GCA : 1-2, MTA : 1.
